# Supplementary material for: Electrophoretic Deposition of WS2 Flakes on Nanoholes Arrays—Role of Used Suspension Medium
Source: PubMed Central journal article supplement (PMC6829434; doi:10.3390/ma12203286), 2019-10-10
Supplement: materials-12-03286-s001.pdf [file materials-12-03286-s001.pdf]

# Electrophoretic Deposition of WS<sub>2</sub> Flakes on Nanoholes Arrays – Role of Used Suspension Medium

Dario Mosconi <sup>1</sup>, Giorgia Giovannini <sup>2</sup>, Nicolò Maccaferri <sup>3</sup>, Michele Serri <sup>4</sup>, Stefano Agnoli <sup>1</sup> and Denis Garoli <sup>4,\*</sup>

<sup>1</sup> Dipartimento di Chimica, Università degli Studi di Padova, Via Marzolo 1, 35131 Padova, Italy

<sup>2</sup> EMPA Federal Swiss research Institute, 9014 St. Gallen, Switzerland

<sup>3</sup> Physics and Materials Science Research Unit, University of Luxembourg, L-1511 Luxembourg, Luxembourg

<sup>4</sup> Istituto Italiano di Tecnologia, via Morego 30, 16163 Genova, Italy

\* Correspondence: denis.garoli@iit.it;

## Detailed XPS Analysis

### Commercial 2H-WS<sub>2</sub> (before exfoliation)

Commercial WS<sub>2</sub> from Sigma-Aldrich was analyzed in order to get the reference for hexagonal 2H-phase BE and FWHM values, both for W 4f and S 2p lines. Moreover, since the surface oxidation due to air exposure generates WO<sub>3</sub>, the values for this species was used as reference too.

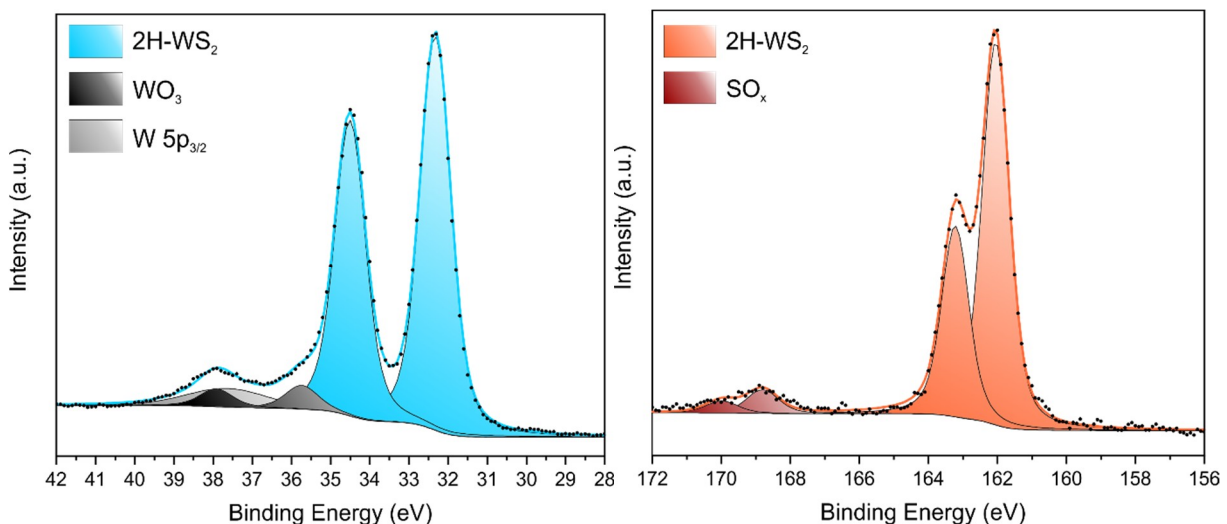

**Figure S1.** W 4f (left) and S 2p (right) core levels of commercial WS<sub>2</sub>.

**Table S1.** Multipeak analysis of W 4f and S 2p photoemission lines for commercial WS<sub>2</sub>.

| W 4f               |         |       | S 2p               |         |       |
|--------------------|---------|-------|--------------------|---------|-------|
| Species            | BE (eV) | % at. | Species            | BE (eV) | % at. |
| 2H-WS <sub>2</sub> | 32.3    | 93.8  | 2H-WS <sub>2</sub> | 162.1   | 92.1  |
| WO <sub>3</sub>    | 35.7    | 6.2   | SO <sub>x</sub>    | 168.8   | 7.9   |

**Pristine 1T-WS<sub>2</sub>**
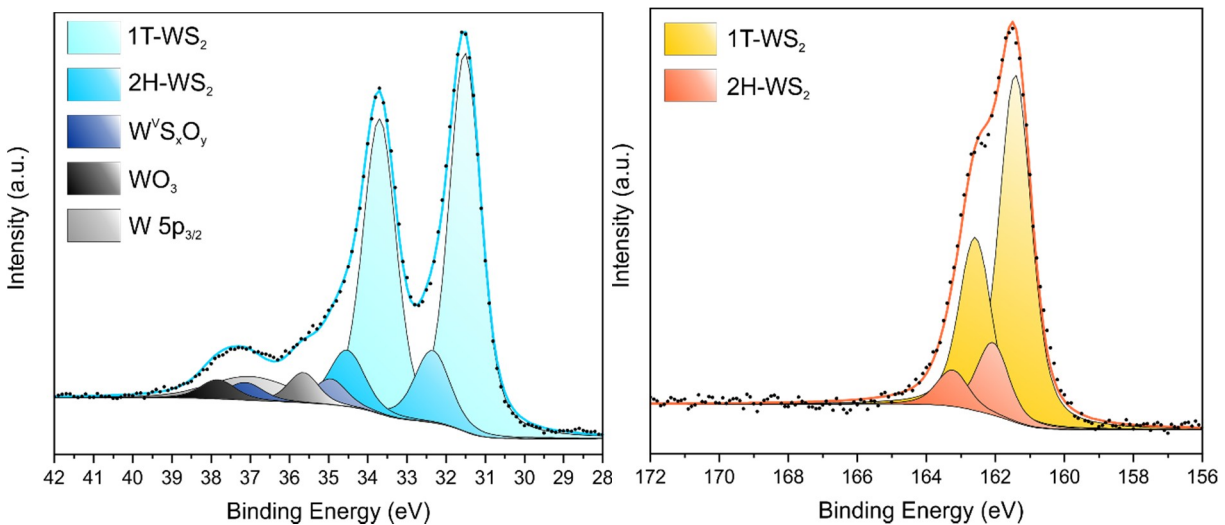
**Figure S2.** W 4f (left) and S 2p (right) core levels of Pristine 1T-WS<sub>2</sub>.

**Table S2.** Multipeak analysis of W 4f and S 2p photoemission lines for Pristine 1T-WS<sub>2</sub>.

| W 4f                                         |         |       | S 2p               |         |       |
|----------------------------------------------|---------|-------|--------------------|---------|-------|
| Species                                      | BE (eV) | % at. | Species            | BE (eV) | % at. |
| 1T-WS <sub>2</sub>                           | 31.5    | 74.2  | 1T-WS <sub>2</sub> | 161.4   | 82.8  |
| 2H-WS <sub>2</sub>                           | 32.3    | 15.5  | 2H-WS <sub>2</sub> | 162.1   | 17.2  |
| W <sup>v</sup> S <sub>x</sub> O <sub>y</sub> | 34.9    | 5.0   | SO <sub>x</sub>    | -       | -     |
| WO <sub>3</sub>                              | 35.7    | 5.3   |                    |         |       |

**1T-WS<sub>2</sub> deposited from B-1**
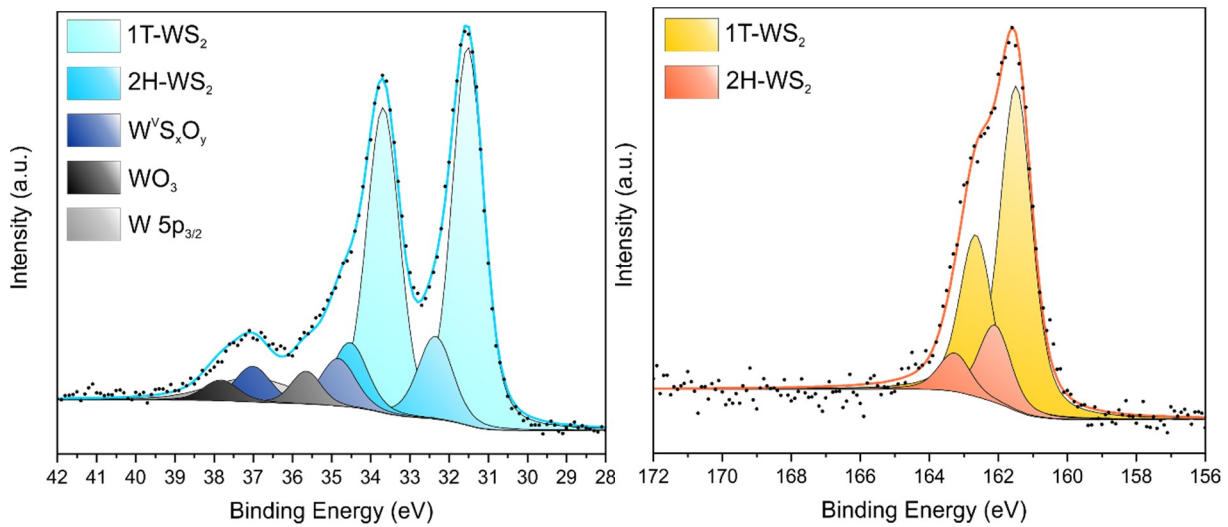

**Figure S3.** W 4f (left) and S 2p (right) core levels of 1T-WS<sub>2</sub> deposited from B-1.

**Table S3.** Multipeak analysis of W 4f and S 2p photoemission lines for 1T-WS<sub>2</sub> deposited from B-1.

| W 4f                                         |         |       | S 2p               |         |       |
|----------------------------------------------|---------|-------|--------------------|---------|-------|
| Species                                      | BE (eV) | % at. | Species            | BE (eV) | % at. |
| 1T-WS <sub>2</sub>                           | 31.5    | 69.2  | 1T-WS <sub>2</sub> | 161.5   | 80.8  |
| 2H-WS <sub>2</sub>                           | 32.3    | 16.3  | 2H-WS <sub>2</sub> | 162.1   | 19.2  |
| W <sup>v</sup> S <sub>x</sub> O <sub>y</sub> | 34.8    | 9.2   | SO <sub>x</sub>    | -       | -     |
| WO <sub>3</sub>                              | 35.7    | 5.3   |                    |         |       |

**1T-WS<sub>2</sub> deposited from MES 10 mM - pH 3**

The presence of SO<sub>x</sub> in S 2p line can be associated with adsorbed MES molecules.

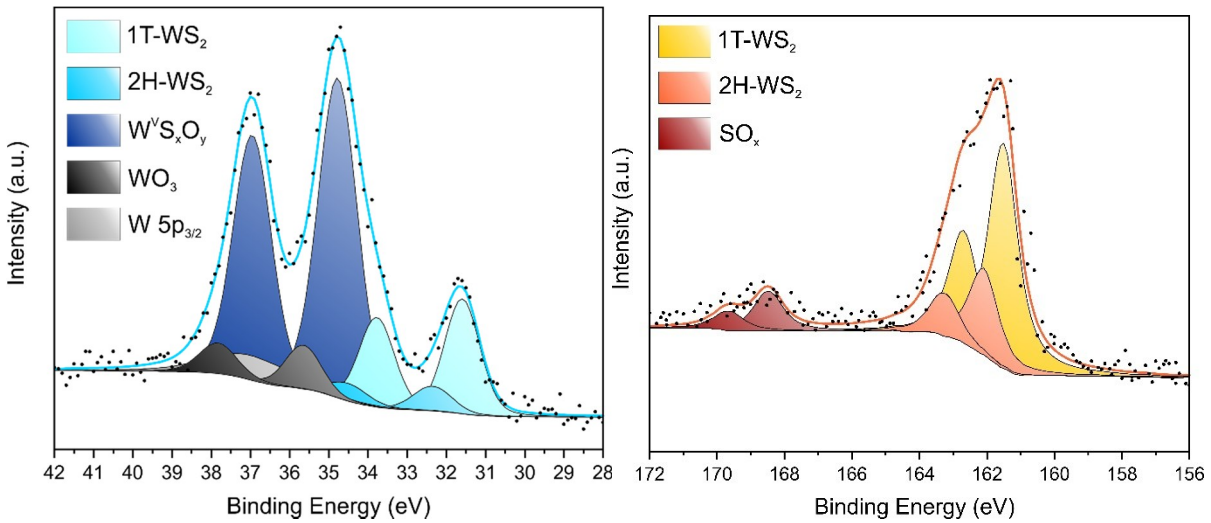

**Figure S4.** W 4f (left) and S 2p (right) core levels of 1T-WS<sub>2</sub> deposited from MES 10 mM - pH 3.

**Table S4.** Multipeak analysis of W 4f and S 2p photoemission lines for 1T-WS<sub>2</sub> deposited from MES 10 mM - pH 3.

| W 4f                                         |         |       | S 2p               |         |       |
|----------------------------------------------|---------|-------|--------------------|---------|-------|
| Species                                      | BE (eV) | % at. | Species            | BE (eV) | % at. |
| 1T-WS <sub>2</sub>                           | 31.6    | 19.2  | 1T-WS <sub>2</sub> | 161.5   | 64.1  |
| 2H-WS <sub>2</sub>                           | 32.4    | 7.4   | 2H-WS <sub>2</sub> | 162.1   | 24.6  |
| W <sup>v</sup> S <sub>x</sub> O <sub>y</sub> | 34.8    | 65.3  | SO <sub>x</sub>    | 168.4   | 11.3  |
| WO <sub>3</sub>                              | 35.7    | 8.1   |                    |         |       |

**1T-WS<sub>2</sub> deposited from MES 10 mM – pH 5**
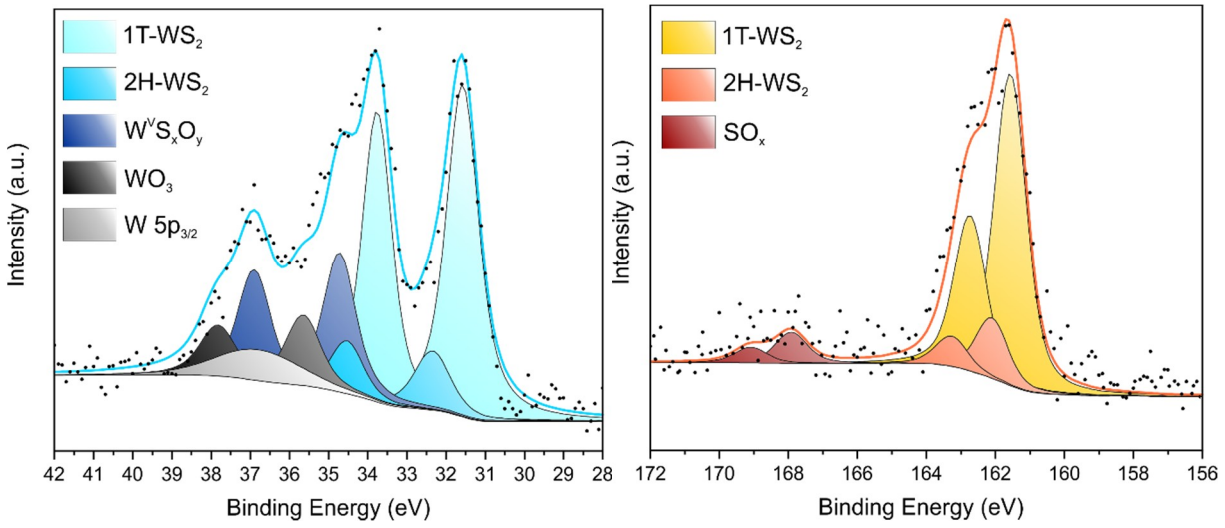

**Figure S5.** W 4f (left) and S 2p (right) core levels of 1T-WS<sub>2</sub> deposited from MES 10 mM - pH 5.

**Table S5.** Multipeak analysis of W 4f and S 2p photoemission lines for 1T-WS<sub>2</sub> deposited from MES 10 mM - pH 5.

| W 4f                                         |         |       | S 2p               |         |       |
|----------------------------------------------|---------|-------|--------------------|---------|-------|
| Species                                      | BE (eV) | % at. | Species            | BE (eV) | % at. |
| 1T-WS <sub>2</sub>                           | 31.6    | 54.7  | 1T-WS <sub>2</sub> | 161.6   | 77.3  |
| 2H-WS <sub>2</sub>                           | 32.4    | 10.6  | 2H-WS <sub>2</sub> | 162.1   | 15.0  |
| W <sup>V</sup> S <sub>x</sub> O <sub>y</sub> | 34.7    | 22.7  | SO <sub>x</sub>    | 167.2   | 7.7   |
| WO <sub>3</sub>                              | 35.7    | 12.0  |                    |         |       |

**1T-WS<sub>2</sub> deposited from MES 10 mM - pH 7**
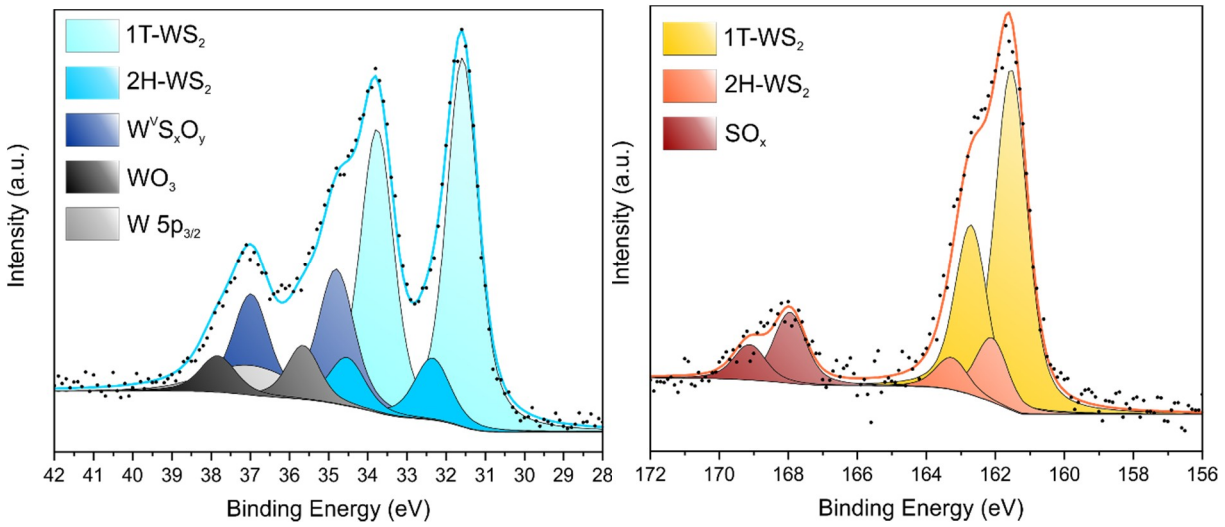

**Figure S6.** W 4f (left) and S 2p (right) core levels of 1T-WS<sub>2</sub> deposited from MES 10 mM - pH 7.

**Table S6.** Multipeak analysis of W 4f and S 2p photoemission lines for 1T-WS<sub>2</sub> deposited from MES 10 mM - pH 7.

| W 4f                                         |         |       | S 2p               |         |       |
|----------------------------------------------|---------|-------|--------------------|---------|-------|
| Species                                      | BE (eV) | % at. | Species            | BE (eV) | % at. |
| 1T-WS <sub>2</sub>                           | 31.6    | 57.7  | 1T-WS <sub>2</sub> | 161.5   | 71.6  |
| 2H-WS <sub>2</sub>                           | 32.4    | 10.8  | 2H-WS <sub>2</sub> | 162.1   | 13.5  |
| W <sup>V</sup> S <sub>x</sub> O <sub>y</sub> | 34.8    | 23.2  | SO <sub>x</sub>    | 168.0   | 14.9  |
| WO <sub>3</sub>                              | 35.7    | 8.3   |                    |         |       |

### 1T-WS<sub>2</sub> deposited from MES 10 mM – pH 8

In this sample the SO<sub>x</sub> band is particularly intense: due to basic pH, sulfonic acid is mainly in the deprotonated form, that may favor the adsorption on WS<sub>2</sub> sheets.

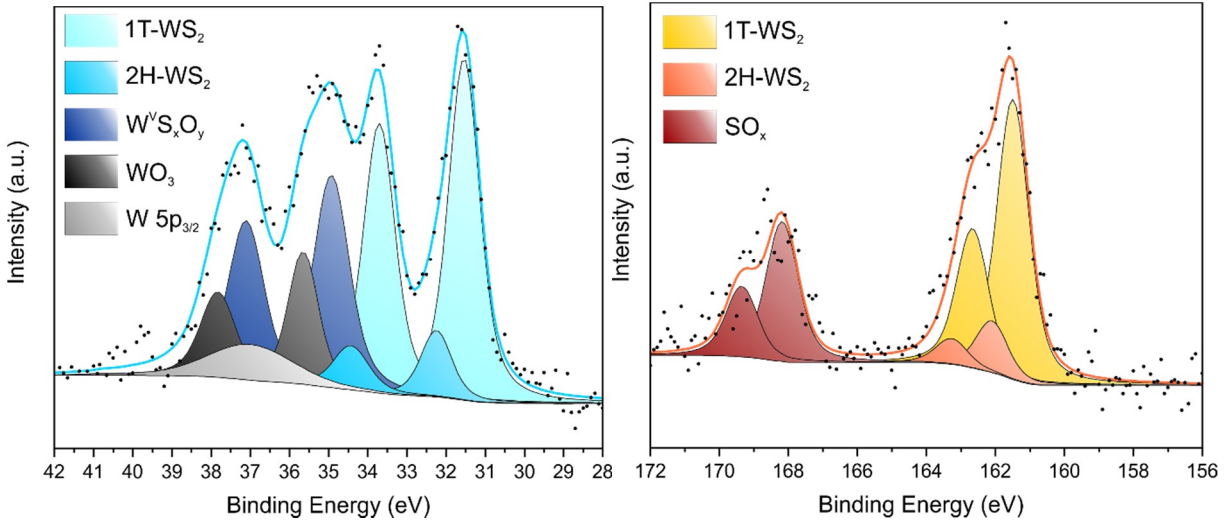

**Figure S7.** W 4f (left) and S 2p (right) core levels of 1T-WS<sub>2</sub> deposited from MES 10 mM – pH 8.

**Table S7.** Multippeak analysis of W 4f and S 2p photoemission lines for 1T-WS<sub>2</sub> deposited from MES 10 mM – pH 8.

| W 4f                                         |         |       | S 2p               |         |       |
|----------------------------------------------|---------|-------|--------------------|---------|-------|
| Species                                      | BE (eV) | % at. | Species            | BE (eV) | % at. |
| 1T-WS <sub>2</sub>                           | 31.5    | 45.0  | 1T-WS <sub>2</sub> | 161.5   | 59.3  |
| 2H-WS <sub>2</sub>                           | 32.3    | 8.3   | 2H-WS <sub>2</sub> | 162.1   | 10.9  |
| W <sup>V</sup> S <sub>x</sub> O <sub>y</sub> | 34.9    | 30.6  | SO <sub>x</sub>    | 168.2   | 29.8  |
| WO <sub>3</sub>                              | 35.7    | 16.1  |                    |         |       |

**1T-WS<sub>2</sub> deposited from PBS 10 mM – pH 7.4**
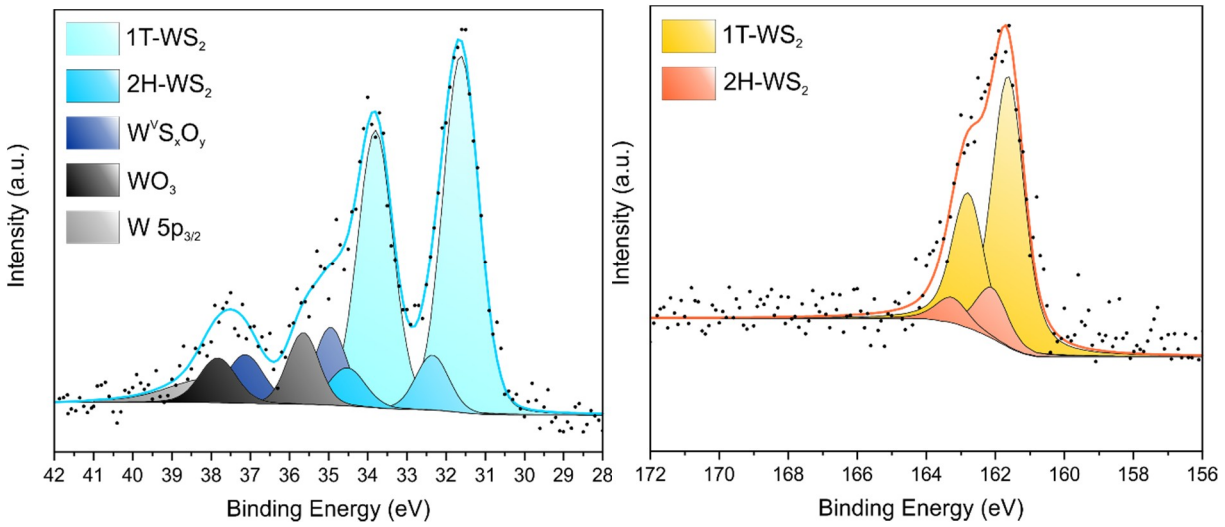

**Figure S8.** W 4f (left) and S 2p (right) core levels of 1T-WS<sub>2</sub> deposited from PBS 10 mM – pH 7.4.

**Table S8.** Multipeak analysis of W 4f and S 2p photoemission lines for 1T-WS<sub>2</sub> deposited from PBS 10 mM – pH 7.4.

| W 4f                                         |         |       | S 2p               |         |       |
|----------------------------------------------|---------|-------|--------------------|---------|-------|
| Species                                      | BE (eV) | % at. | Species            | BE (eV) | % at. |
| 1T-WS <sub>2</sub>                           | 31.6    | 66.9  | 1T-WS <sub>2</sub> | 161.6   | 84.3  |
| 2H-WS <sub>2</sub>                           | 32.4    | 9.2   | 2H-WS <sub>2</sub> | 162.1   | 15.7  |
| W <sup>v</sup> S <sub>x</sub> O <sub>y</sub> | 34.9    | 12.5  | SO <sub>x</sub>    | -       | -     |
| WO <sub>3</sub>                              | 35.7    | 11.4  |                    |         |       |



**1T-WS<sub>2</sub> deposited from PBS 1 mM – pH 7.4**
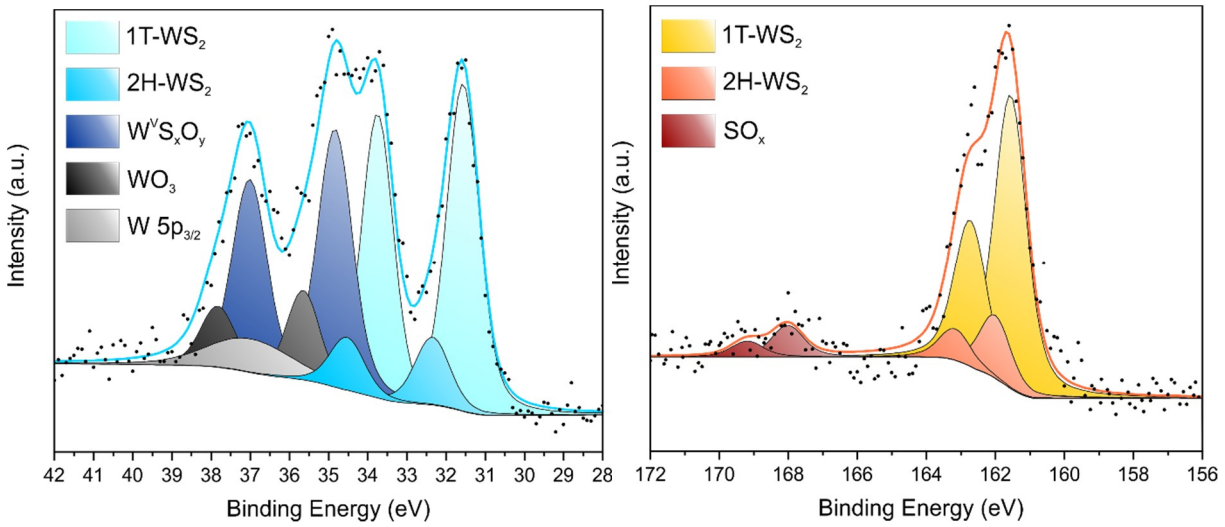

**Figure S9.** W 4f (left) and S 2p (right) core levels of 1T-WS<sub>2</sub> deposited from PBS 1 mM – pH 7.4.

**Table S9.** Multipeak analysis of W 4f and S 2p photoemission lines for 1T-WS<sub>2</sub> deposited from PBS 1 mM – pH 7.4.

| W 4f                                         |         |       | S 2p               |         |       |
|----------------------------------------------|---------|-------|--------------------|---------|-------|
| Species                                      | BE (eV) | % at. | Species            | BE (eV) | % at. |
| 1T-WS <sub>2</sub>                           | 31.6    | 44.1  | 1T-WS <sub>2</sub> | 161.5   | 75.7  |
| 2H-WS <sub>2</sub>                           | 32.4    | 9.4   | 2H-WS <sub>2</sub> | 162.1   | 16.2  |
| W <sup>V</sup> S <sub>x</sub> O <sub>y</sub> | 34.8    | 35.4  | SO <sub>x</sub>    | 168.0   | 8.1   |
| WO <sub>3</sub>                              | 35.7    | 11.1  |                    |         |       |

1T-WS<sub>2</sub> deposited from PBS 0.1 mM – pH 7.4

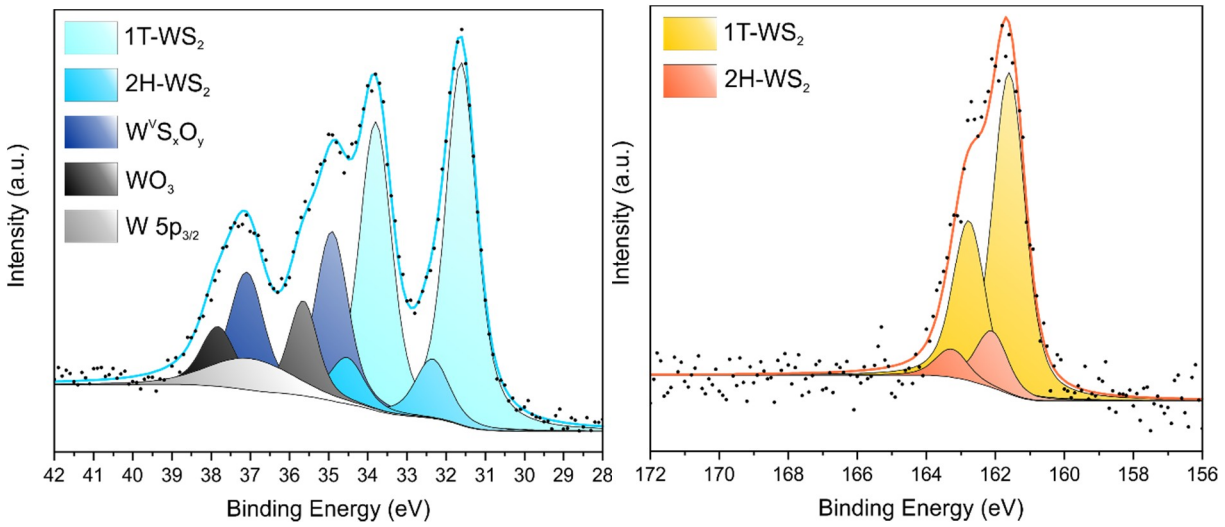

**Figure S10.** W 4f (left) and S 2p (right) core levels of 1T-WS<sub>2</sub> deposited from PBS 0.1 mM – pH 7.4.

**Table S10.** Multippeak analysis of W 4f and S 2p photoemission lines for 1T-WS<sub>2</sub> deposited from PBS 0.1 mM – pH 7.4.

| W 4f                                         |         |       | S 2p               |         |       |
|----------------------------------------------|---------|-------|--------------------|---------|-------|
| Species                                      | BE (eV) | % at. | Species            | BE (eV) | % at. |
| 1T-WS <sub>2</sub>                           | 31.6    | 53.6  | 1T-WS <sub>2</sub> | 161.5   | 85.1  |
| 2H-WS <sub>2</sub>                           | 32.4    | 9.4   | 2H-WS <sub>2</sub> | 162.1   | 14.9  |
| W <sup>V</sup> S <sub>x</sub> O <sub>y</sub> | 34.9    | 24.5  | SO <sub>x</sub>    | -       | -     |
| WO <sub>3</sub>                              | 35.7    | 12.4  |                    |         |       |
